# Supplementary figures and images for: Breast cancer subtype specific biochemical responses to radiation
Source: Royal Society of Chemistry journal article supplement (doi:10.1039/c8an00345a), 2018-01-01

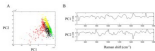

Supplementary 1. PCA results from (A) PC1 and 2, scores and (B) loadings.

Supplement: c8an00345a1.pdf [file c8an00345a1.pdf]
